# Supplementary material
Source: PubMed Central journal article supplement (PMC7301843)
Supplement: AEM.00408-20-s0001.pdf [file AEM.00408-20-s0001.pdf]

## SUPPLEMENTARY INFORMATION

### *acrIIA4* expression cassette

5'-ATGCATGAGCTCAAAAAGTATAACAGAGGTTTTAATTTACGCCTCTGTTATACTTTTTA  
TTTTTGAATTTTTTTGTTTTAAAGCTGTATTTTAAATTTATATACTTGGTTTATTTACTTGA  
TTATTTCTGTAATTTAGTGGAGACATTGAAAAATGTTTTGAAAAAGTTTTTGAAAATAACA  
GGGAGTCACTATAACCTACACTACTTGGCGACTTCTCCTATAGGAAGTTTAGTGCTTTTTA  
ATAAAAGGGTGGCTTTGTACATTCTAAGGTTTATTTAAATATCTTTGAGGAGAAATCCAA  
GGTTTTTTATGAACATTTTATATAAATAACTTCTACTTAAGTTCACATAATCAGCAATTTCT  
TGAACAGTTATGCTATGCATGTAATTAGAATTAATGAAATTAAGAGCATCTTGAATATATG  
TGTGTAATTCCTTATCTTTGTATTCAAAGGTTTTGGGAATTCTTCTATAAGTGCGTACAA  
TAATGAGTAAAGTTCTTTTAGTAATAGTATGTCATCAGATCTTGAAGGATTATAAGTTTTT  
GATATTTTCGCACATATTTAATATTATCTGTGGAATTTTTGAGTTTTCTTCACAATTAGCAAC  
ACAGGAGTTAGTAATAGAAGTTCTATTTAAATACTCATTAGCATTGGAACCACTAAATCCT  
ATCCAGTAGTATTCCCAAGGATCATCAATAGAAGCCACATACTCAACTTGCATACCTTTT  
AGTAGTATAAAAATATCACCTTGTTTTAAGTTATATACCTTACCATTAATTTAAAAGTTCC  
ATATCCCTTAGTTACGTAATGAATAACAGCATTTTTTCAATACTTCATAGTTATATCCTAATC  
CTGGTATACCTTGTTCTATACCACATTCATCTACATTCATTTCAAAGTTTTCTTTAACATAC  
TTTTTCCACAATATTTGCATTTCTACCTCCTAACCTATAAAATTAGCCAATTTTATAGTAGT  
CTTATATTAACATTTACATGAGAGCTTTGCAAAGCAGTTTATCAACATAAAAGCTTTTTTA  
TTTTAAAATAAATTCCTTCTAAATATAAGAATATTTTAAAGAAATATCTTTATATATTAGTTAT  
TAAAATTTATAAGATTATAAGAAACATTATAACATATTTTAGAATTTTTAACTATTCTAAAA  
GATTAATTTACATATTAACATTTAATTATGGGTAAAACTATTTTGAAAAATGATTTATATG  
GAATTATGTTTCTTAAATATACAATCATGTTTCATGAATACATAATTATTTTAAATGTATTG  
GGAGGGTAAAATGATATTA AAAAATGAATACCATGAAGATACTGCAGAATCTAGAATCCG  
CGGTAGTCGACGTGGAATTGTGAGCGGATAACAATTTACAGGAGGGCTGAAATGAATA  
TTAATGACTTAATTAGAGAAATAAAAAACAAGATTACACAGTGAAATTGAGTGGTACGG  
ATAGCAATAGTATAACACAGCTAATTATTAGAGTTAATAATGATGGAAACGAGTATGTAAT  
TTCTGAAAGTGAAAATGAATCAATAGTTGAAAAATTCATATCTGCATTTAAAAACGGTTGG  
AATCAAGAATACGAGGATGAAGAAGAATTTTATAATGACATGCAAACAATCACCTTAAAA  
AGTGAGTTGAACTAAGAGCTCATGCAT-3'

### gRNA expression cassette

5'-GAGCTCACTCTATCATTGATAGAGTTTGAACTCTATCATTGATAGAGTATAATATCTT  
TGTTCAATTGAGACCAGATCTCCCGGGGATATCGCTAGCGGTCTCTGTTTTAGAGCTAGA  
AATAGCAAGTTAAAATAAGGCTAGTCCGTTATCAACTTGAAAAAGTGGCACCGAGTCGG  
TGCTTTTTTTGAAGCTTGAGCTC-3'
